# Supplementary material for: Changes to coral health and metabolic activity under oxygen deprivation
Source: PeerJ. 2016 Apr 19;4:e1956. doi: 10.7717/peerj.1956 (PMC4841221; doi:10.7717/peerj.1956)
Supplement: Data S1 — Dataset includes values for control, treatment, and reference corals (labeled ‘tank’) for both alanopine and strombine dehydrogenase activity (units: nmols/min/mg protein). [file peerj-04-1956-s001.xlsx]

## Sheet: Alanopine Dehydrogenase RawData
	control					treatment					Tank
3 hour	0.312819	0.118215	0.181552	0.589496	2.96892	2.29689	0.627313	0.887817	0.0783443	0.101731	0.365309	2.4298	0.297428	2.24223	0.339407
6 hour	0.24741	0.0520594	0.22508	-0.0774086	0.578778	0.232842	0.243978	5.87342	0.328689	1.64523	0.365309	2.4298	0.297428	2.24223	0.339407
1 day	1.81719	0.995891	0.99421	1.84766	0.192671	0.878229	2.88927	5.78685	4.06476	5.22508	0.365309	2.4298	0.297428	2.24223	0.339407
3 day	0.0823465	0.163544	0.876742	1.5026	0.307358	5.0978	8.80034	3.35672	4.61955	1.22334	0.365309	2.4298	0.297428	2.24223	0.339407
	Tank samples used as reference for controls to confirm bubbling had no effect on enzyme activity. Control and treatment activities were compared in figures. Activity is in nmols/min/mg protein.

## Sheet: Strombine Dehydrogenase RawData
	control					treatment					Tank
3 hour	0.685959	0.194618	0.263168	0.689156	3.30788	2.82315	0.932664	1.31208	0.169704	0.252641	0.784147	2.3294	0.324223	2.71597	0.329582
6 hour	0.362629	-0.0926918	0.200965	0.0410861	1.12719	0.838934	0.41354	4.43679	0.568953	2.54734	0.784147	2.3294	0.324223	2.71597	0.329582
1 day	2.5585	1.52286	1.8319	2.43033	0.478576	1.47553	4.55698	7.05703	5.72526	7.86777	0.784147	2.3294	0.324223	2.71597	0.329582
3 day	0.675241	0.166131	1.96992	1.13969	0.516256	7.34861	10.6699	4.08263	5.87674	1.40586	0.784147	2.3294	0.324223	2.71597	0.329582
	Tank samples used as reference for controls to confirm bubbling had no effect on enzyme activity. Control and treatment activities were compared in figures. Activity is in nmols/min/mg protein.

## Sheet: Lactate Dehydrogenase RawData
	control					treatment					Tank
3 hour	-0.055005	-0.101637	-0.0946767	-0.0631559	-0.179285	0.121609	-0.00216914	-0.0800031	-0.0687746	-0.182758	0.0901296	-0.101953	-0.10031	-0.0133976	-0.0407288
6 hour	-0.0676054	0.143848	-0.0107181	-0.0654996	0.00798605	-0.286512	0.066095	0.0392689	0.0339407	0.0511298	0.0901296	-0.101953	-0.10031	-0.0133976	-0.0407288
1 day	-0.0241158	-0.401929	0.104948	-0.0990614	-0.213311	-0.118346	-0.0602894	0.03218	-0.151314	-0.0153116	0.0901296	-0.101953	-0.10031	-0.0133976	-0.0407288
3 day	-0.028971	-0.0991425	-0.0250089	-0.120864	-0.135387	-0.0643087	-0.0772068	-0.0954582	-0.0766368	-0.0695737	0.0901296	-0.101953	-0.10031	-0.0133976	-0.0407288
	Tank samples used as reference for controls to confirm bubbling had no effect on enzyme activity. Control and treatment activities were compared in figures. Activity is in nmols/min/mg protein.

## Sheet: Octopine Dehydrogenase RawData
	control					treatment					Tank
3 hour	-0.107181	-0.251643	-0.114326	0.00214362	-0.0996785	-0.101822	-0.0760986	-0.060126	-0.616291	-0.0696677	-0.123258	0.0203644	-0.0694693	-0.00643087	-0.124105
6 hour	-0.159187	-0.0553769	-0.133976	-0.0785995	-0.0584624	-0.13487	0.0788691	0.0778339	-0.126867	-0.082447	-0.123258	0.0203644	-0.0694693	-0.00643087	-0.124105
1 day	-0.120104	-0.250089	-0.00267953	-0.0146156	-0.113539	-0.238722	-0.0915505	-0.07592	-0.120579	-0.18527	-0.123258	0.0203644	-0.0694693	-0.00643087	-0.124105
3 day	-0.19317	-0.123994	-0.30676	-0.366889	-0.121284	0.00446588	0.207311	-0.202507	-0.0504359	-0.211013	-0.123258	0.0203644	-0.0694693	-0.00643087	-0.124105
	Tank samples used as reference for controls to confirm bubbling had no effect on enzyme activity. Control and treatment activities were compared in figures. Activity is in nmols/min/mg protein.
